# Supplementary material for: Multicomponent redox gradients on photoactive electrode surfacesElectronic supplementary information (ESI) available: experimental section. See http://www.rsc.org/suppdata/cc/b4/b400027g/
Source: Royal Society of Chemistry journal article supplement (doi:10.1039/b400027g), 2004-01-01
Supplement: b400027g.doc [file b400027g.doc]

### Supporting Information

### Film Preparation

### 1% solution of PDDA, pH = 8.5; C60, ZnP, ZnP’, H2P, Fc, pH = 7.2; DI water for rinsing, pH = 7.2. All solutions were made in DI water / phosphate buffer. Wafers/ITO/quartz slides were cleaned in piranha solution, rinsed with DI water, sonicated for 15 min. and again thoroughly rinsed with DI water. After that, they were coated with a precursor layer of PDDA (10 minutes exposure), followed by deposition of D-C609-, ZnP8+, ZnP8-, H2P8+, Fc1+ (45 minutes exposure).

### Photoelectrochemical Measurements

Photoelectrochemical measurements were carried out in a 3-arm cell that had provision to insert a working electrode (ITO), counter (Pt gauze) and reference (Ag/AgCl)-(when biass voltage was applied). The electrolyte was either 0.1 M NaH2PO4 (pH 4.7) or 0.1 M NaCl (pH 4.7) and N2 or O2 was bubbled into the solution for 10-15 minutes prior to photoelectrochemical measurements. The voltage was applied using a Princeton Applied Research, model 175 Galvanostat/Potentiostat. Photocurrent measurements were carried out using a Keithley model 617 programmable electrometer immediately after illumination. A collimated light beam from a 150 W Xenon lamp was used for UV illumination. When white light was used, a 375 nm cut filter was used. When recording a photoaction spectrum, a Bausch and Lomb high-intensity grating monochromator was introduced into the path of the excitation beam for selecting the required wavelengths. The incident photon to current conversion efficiency (IPCE), defined as the number of electrons collected per incident photon, was evaluated from short circuit photocurrent measurements at different wavelengths versus the photocurrent measured using a photodiode of the type PIN UV 100 (UDT Sensors Inc.).

### Syntheses Protocols

### Chemicals and solvents were used as received unless otherwise noted. Solvents were dried using standard procedures. Column chromatography was performed on silica gel 60, 40 – 63 µm, Merck. 1H and 13C NMR spectra were recorded on JEOL JMM EX 400, JEOL GX 400 instruments. FAB mass spectrometry was performed with Micromass Zabspec and Varian MAT 311A machines. UV/VIS spectra were recorded on a Shimadzu UV-3102 PC UV/Vis NIR scanning spectrophotometer. IR spectra were taken with a Bruker Vector 22 spectrometer.

### Preparation of 5,10,15,20-tetrakis-(2’,6’-bis-(N-methylene-(4’’-t-butylpyridinium))-4’-*tert*-butylphenyl)porphyrin-octabromide H2P8+

5,10,15,20-tetrakis-[2’,6’-bis-(bromomethyl)-4’-*tert*-butyl-phenyl]porphyrin1 (40 mg, 0.025 mmol) and 4-*tert*-butylpyridine (0.21 ml, 1.7 mmol) were dissolved in 5 ml of dry pyridine. The mixture was refluxed for 24 h and the solvent removed *in vacuo*. The residue was suspended in diethyl ether and filtered. The dark residue was washed with diethyl ether and dissolved in methanol. A layer of diethyl ether was carefully placed on top of the methanol. The mixture was placed in a freezer at 0°C over night after which tiny bluish-greenish crystals precipitated. The material was filtered and dried in high vacuum (ca. 10-3 torr). Yield 52 mg (81 %); mp ~230°C (decomp.).

1H NMR (400 MHz, CDCl3, RT):  -2.59 (s, 2H, NH), 1.14 (s, 72H, pyridyl *tert*-butyl), 1.27 (s, 36H, *tert*-butyl), 5.89 (s, 16H, CH2), 6.69 (s, 8H, phenyl CH), 7.93 (d, 16H, 3*J* = 6.9 Hz, *-*pyridyl CH), 9.19 (s, 8H, **-pyrryl CH), 9.51 (d, 16H, 3*J* = 6.9 Hz, **-pyridyl CH).

13C NMR (100.5 MHz, CDCl3, RT):  29.8, 31.1, 35.1, 36.5, 62.1, 112.6, 121.7, 125.4, 135.7, 137.4, 145.0, 153.9, 171.3.

IR (KBr):  3853 cm-1, 3839, 3750, 3424, 3121, 3039, 2964, 2870, 1638, 1562, 1510, 1460, 1399, 1367,1 275, 1205, 1113, 966, 850, 805, 724, 555.

UV/VIS (MeOH):  422 nm ( 252600 lcm-1mol-1), 469 (18200), 517 (20000), 551 (7300), 587 (7300).

### Preparation of zinc-5,15-bis-(2,6-bis-(2’’,2’’-bis-(ethoxy­carbonyl)-ethyl)-methyl-4’-*tert*-butylphenyl)-10,20-bis-(4’- *tert* -butylphenyl)porphyrin (precursor of ZnP8-)

Potassium hydride (125 mg, 3.1 mmol) was suspended in 15 ml of dry DMF under a nitrogen atmosphere. Diethyl malonate (0.12 ml, 0.78 mmol) was added dropwise at room temperature and the mixture stirred for 1 h. A solution of zinc-5,15-bis-[2’,6’-bis-(bromomethyl)-4’-*tert*-butylphenyl]-10,20 bis-(4’- *tert*-butylphenyl)porphyrin (50 mg, 0.039 mmol) in 5 ml of dry DMF was added dropwise. The mixture was stirred at 50 °C for 1 h and poured onto an ice-cold saturated NH4Cl solution. After filtration the residue was washed thoroughly with water, dissolved in CH2Cl2 and this solution dried over MgSO4. Chromatography on silica gel (column: length 20 cm; diameter 3 cm; solvent CH2Cl2/EtOAc 20/1) gave a pink microcrystalline material. Yield 35 mg (56 %); mp ~200°C (decomp.).

1H NMR: (400 MHz, CDCl3, RT):  0.80 (t, 24H, 3*J*=7.2 Hz, ethyl CH3), 1.53 (s, 18H, *tert*-butyl), 1.61 (s, 18H, *tert*-butyl), 2.82 (d, 8H, 3*J*=7.4 Hz, CH2), 3.02 (t, 4H, 3*J*=7.4 Hz, CH), 3.65 (m, 16H, 3*J*=7.2 Hz, ethyl CH2), 7.48 (s, 4H, phenyl CH), 7.75 (d, 4H, 3*J*=8.1 Hz, phenyl CH), 8.17 (d, 4H, 3*J*=8.1 Hz, phenyl CH), 8.70 (d, 4H, 3J=4.7 Hz, **-pyrryl CH), 8.92 (d, 4H, 3J=4.7 Hz, **-pyrryl CH).

13C-NMR (100.5 MHz, CDCl3, RT):  13.5, 29.6, 31.5, 31.7, 33.8, 34.8, 52.5, 60.8, 115.7, 120.7, 123.4, 124.6, 130.7, 132.7, 134.6, 139.4, 139.6, 140.1, 150.0, 150.1, 150.6, 151.1, 168.9; MS (FAB, NBA) m/z 1591 (M+), 1518 (M-COOEt), 1447 (M-2COOEt).

IR (KBr):  2964 cm-1, 2906, 2870, 1753, 1734, 1637, 1524, 1465, 1445, 1394, 1368, 1336, 1283, 1221, 1202, 1151, 1111, 1097, 1066, 1034, 998, 859, 798, 721, 523.

UV/VIS (CH2Cl2):  423 nm ( 524300 lcm-1mol-1), 551 (20300), 590 (3500).

### Preparation of zinc-5,15-bis-[2’,6’-bis-{2’’,2’’-bis-(carboxy)-ethyl}-methyl-4’-*tert*-butyl-pheny]-10,20-bis-(4’-*tert*-butylphenyl)porphyrin-octasodium-salt ZnP8-

Zinc-5,15-bis-(2,6-bis-(2’’,2’’-bis-(ethoxy­carbonyl)-ethyl)-methyl-4’-*tert*-butylphenyl)-10,20-bis-(4’- *tert* -butylphenyl)porphyrin (30 mg, 0.019 mmol) and finely grounded sodium hydroxide (150 mg, 3.75 mmol) were suspended in 20 ml of ethanol. The mixture was refluxed for 12 and a precipitate formed. The mixture was cooled to room temperature and filtered. The residue was washed with little ice-cold ethanol and dried in high vacuum to give a pink material. Yield 27 mg (93.6 %); mp ~200°C (decomp.).

1H NMR (400 MHz, D2O, RT):  1.60 (s, 18H, *tert*-butyl), 1.63 (s, 18H, *tert*-butyl), 2.66 (d, 8H, 3*J*=7.3 Hz, CH2), 3.03 (t, 4H, 3*J*=7.3 Hz, CH), 7.71 (s, 4H, phenyl CH), 7.96 (d, 4H, 3*J*=8.3 Hz, phenyl CH), 8.29 (d, 4H, 3*J*=8.3 Hz, phenyl CH), 8.90 (d, 4H, 3*J*=4.6 Hz, **-pyrryl CH), 9.00 (d, 4H, 3*J*=4.6 Hz, **-pyrryl CH).

13C-NMR (100.5 MHz, D2O, RT):  31.3, 34.6, 34.8, 35.7, 59.2, 118.0, 120.6, 123.2, 124.1, 131.9, 132.7, 135.1, 139.5, 140.6, 142.3, 150.5, 150.7, 151.3, 151.9, 179.1.

IR (KBr):  2960 cm-1, 2868, 1586, 1410, 1362, 1332, 1202, 1110, 1065, 996, 882, 839, 800, 723, 625, 554, 501.

UV/VIS (H2O):  425 nm ( 436900 lcm-1mol-1), 559 (15400), 598 (7000).

**Figure S1**: UV-Vis absorption spectra of a quartz substrate (upper Figure) and an ITO-electrode (lower Figure) bearing monolayer coverages of PDDA/D-C609-, PDDA/D-C609-/H2P8+, PDDA/D-C609-/H2P8+/ZnP8- and PDDA/D-C609-/H2P8+/ZnP8-/Fc1+.


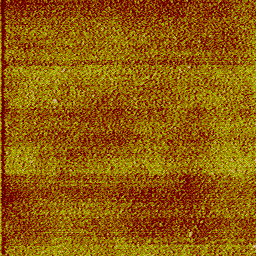

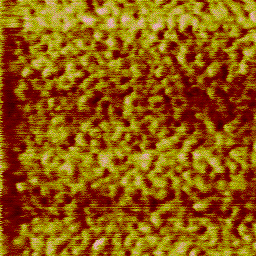


**c**

**d**


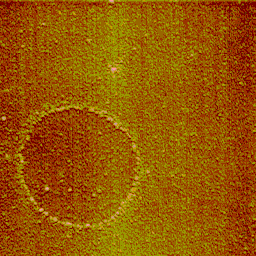

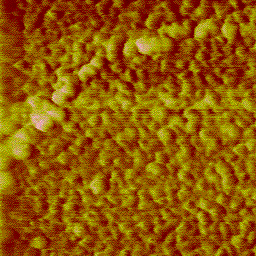


**e**

**f**


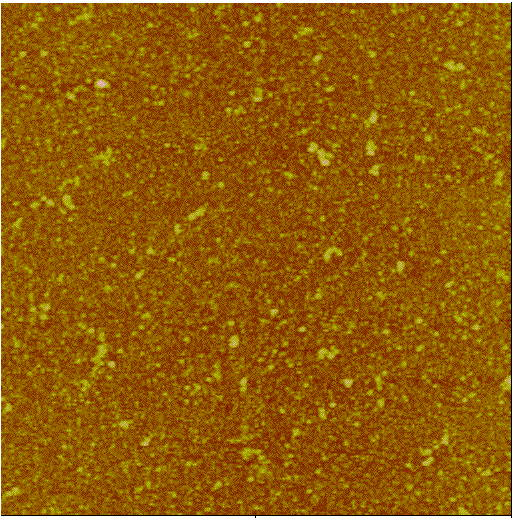

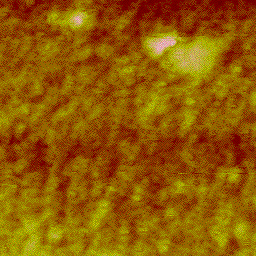


**g**

**h**


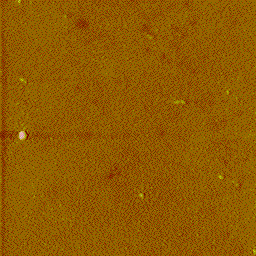

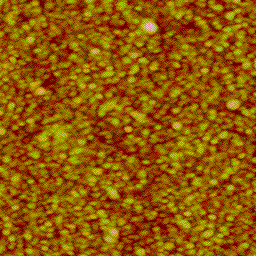


**a**

**b**

**Figure S2**: Atomic force microscopy image of PDDA/D-C609- (images a: 5µm  5 µm and b: 1µm  1 µm), PDDA/D-C609-/H2P8+ (images c: 5µm  5 µm and d: 1µm  1 µm), PDDA/D-C609-/H2P8+/ZnP8- (images e: 5µm  5 µm and f: 1µm  1 µm), and PDDA/D-C609-/H2P8+/ZnP8-/Fc1+ (images g: 5µm  5 µm and h: 1µm  1 µm) assembled onto a cleaned silicon wafer.
